# Supplementary material for: Graphite particles modified by ZnO atomic layer deposition for Li-ion battery anodes
Source: Royal Society of Chemistry journal article supplement (doi:10.1039/d4ya00518j), 2025-01-01
Supplement: d4ya00518j1.pdf [file d4ya00518j1.pdf]

## Supporting Information

### Graphite Particles Modified by ZnO Atomic Layer Deposition for Li-ion Battery Anodes

Ahmad Helaley <sup>a</sup>, Han Yu <sup>b</sup>, and Xinhua Liang <sup>a, \*</sup>

<sup>a</sup> Department of Energy, Environmental and Chemical Engineering, Washington University in St. Louis, St. Louis, MO 63130, USA

<sup>b</sup> Linda and Bipin Doshi Department of Chemical and Biochemical Engineering, Missouri University of Science and Technology, Rolla, MO 65409, USA

\* Corresponding author. Email: [xinhua.liang@wustl.edu](mailto:xinhua.liang@wustl.edu)

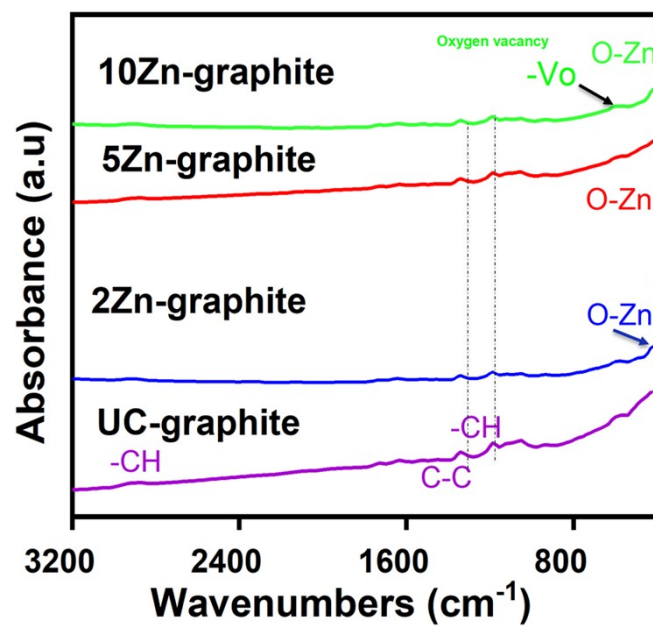

**Fig. S1.** FTIR spectra of pristine graphite particles and graphite particles coated with various number of ZnO ALD cycles.

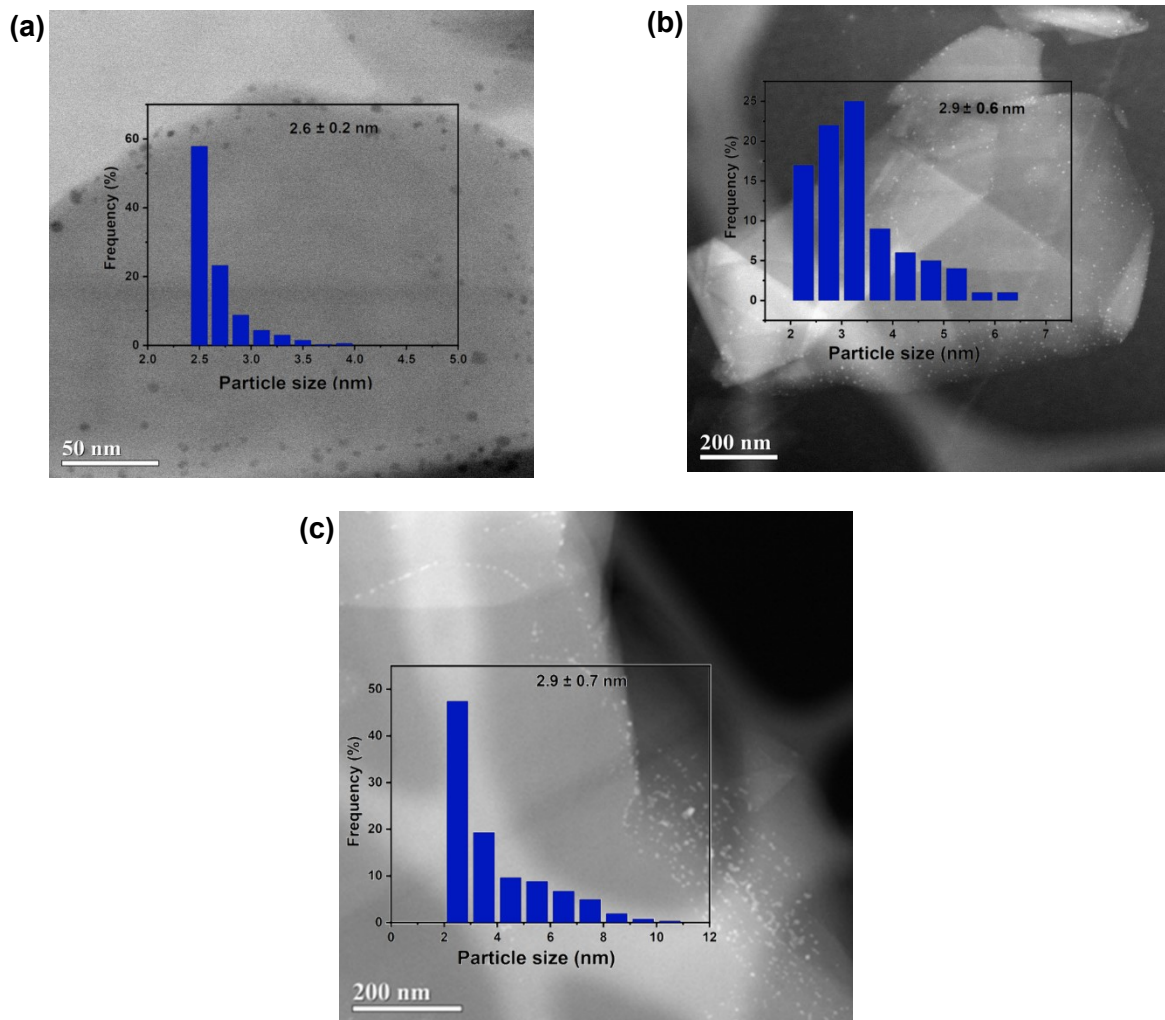

**Fig. S2.** TEM images of (a) 2Zn-graphite powders, (b) 5Zn-graphite powders, and (c) 10Zn-graphite powders. The inset image shows the size distributions of ZnO nanoparticles.

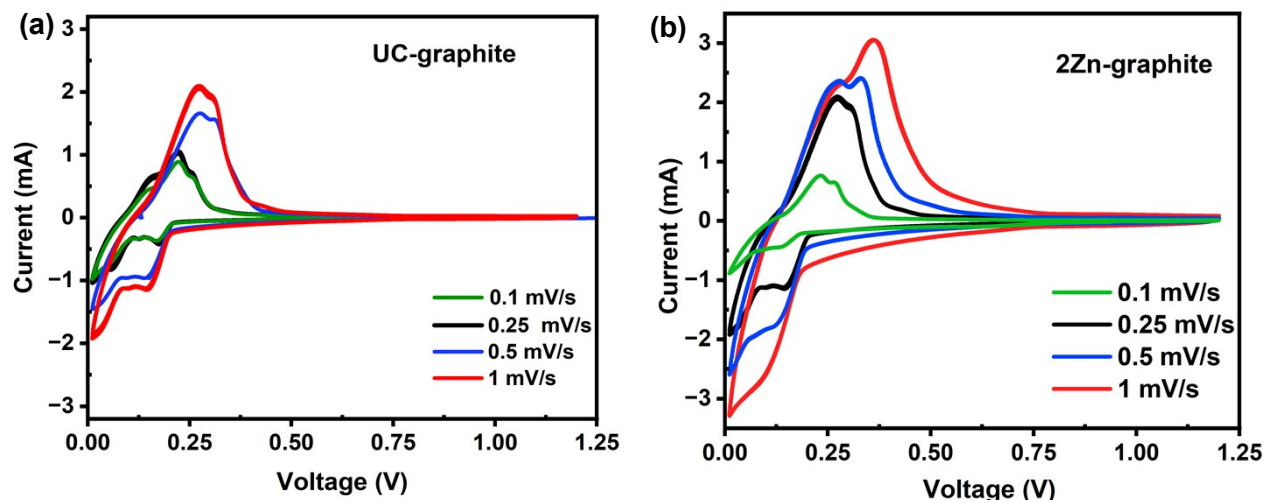

**Fig. S3.** The first cycle of the CV profile at various scan rates for (a) UC-graphite anode (b) 2Zn-graphite anode.

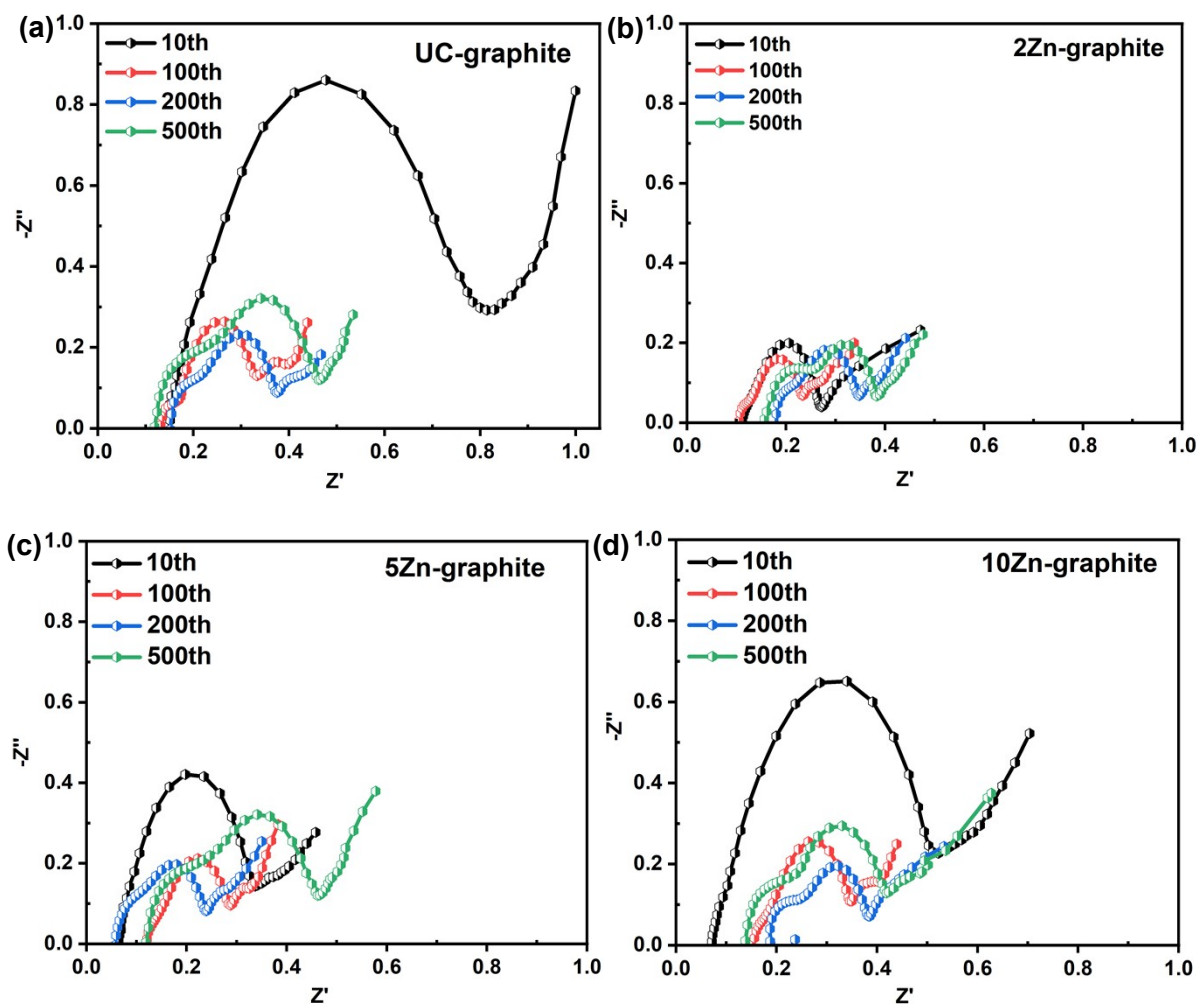

**Fig. S4.** After normalization, the Nyquist plot of anode samples tested at a 1C rate with a potential range of 0.1 V - 3.0 V for the 10<sup>th</sup>, 100<sup>th</sup>, 200<sup>th</sup>, and 500<sup>th</sup> charge/discharge cycles for (a) UC-graphite, (b) 2Zn-graphite, (c) 5Zn-graphite, and (d) 10Zn-graphite.

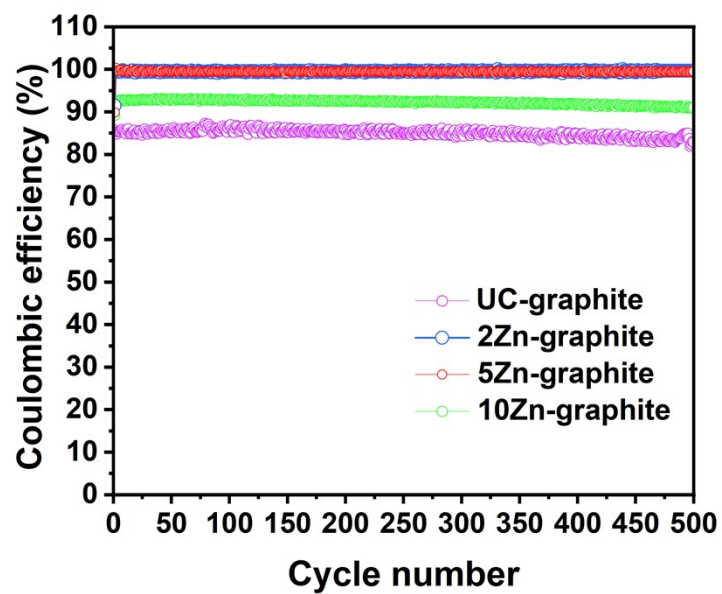

**Fig. S5.** Coulombic efficiencies of graphite electrodes.

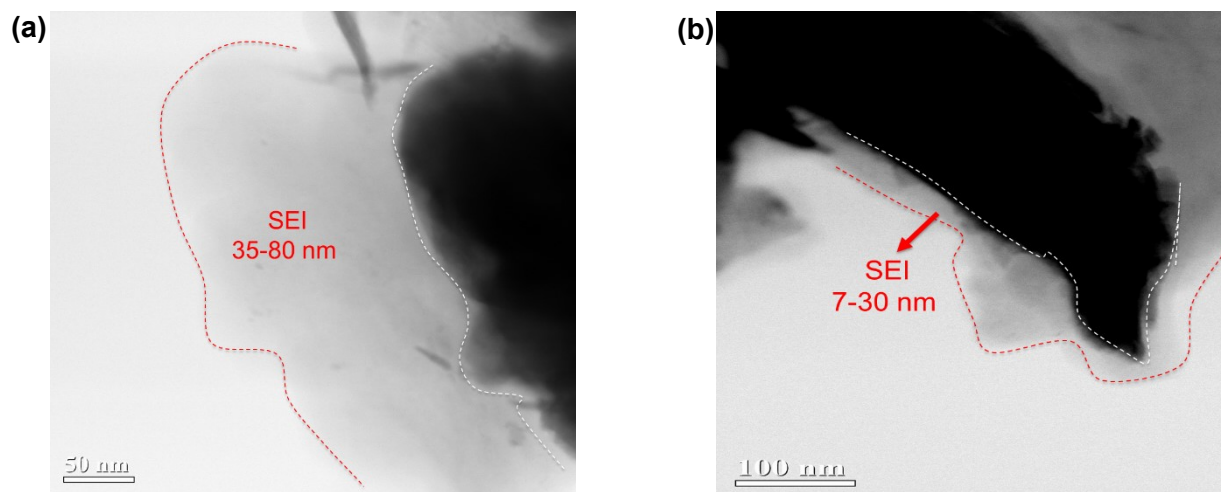

**Fig. S6.** TEM images of the (a) cycled UC-graphite electrode and (b) cycled 2Zn-graphite electrode after 500 cycles of charge/discharge.

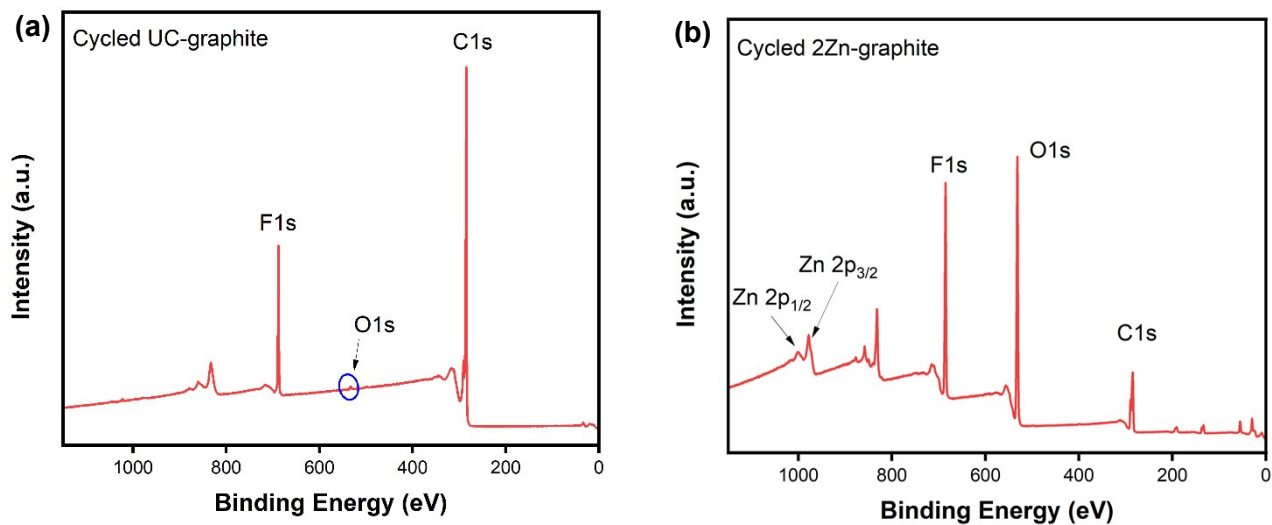

**Fig. S7.** Scan survey of (a) cycled UC-graphite electrode, and (b) cycled 2Zn-graphite electrode after 100 cycles of charge/discharge.

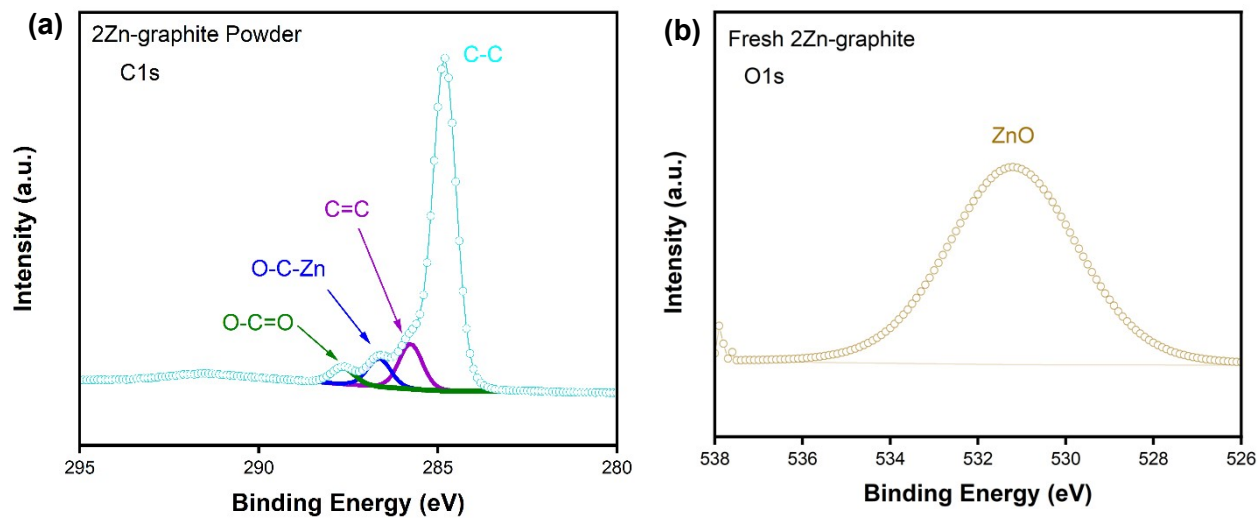

**Fig. S8.** XPS spectra: (a) C1s of fresh 2Zn-graphite powders, and (b) O1s of fresh 2Zn-electrode.

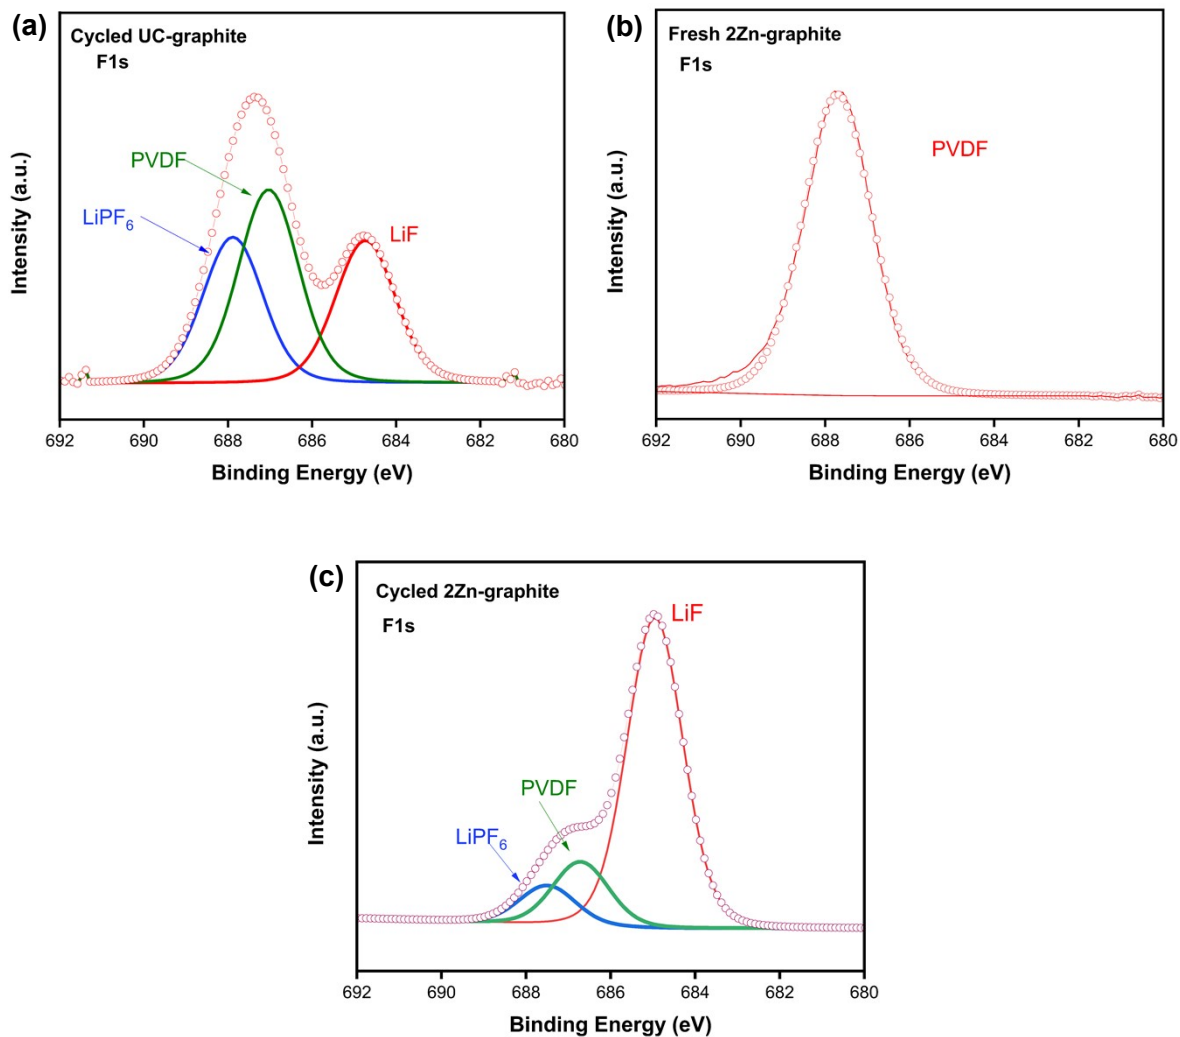

**Fig. S9.** XPS F1s spectra of (a) cycled UC-graphite, (b) fresh 2Zn-graphite, and (c) cycled 2Zn-graphite.



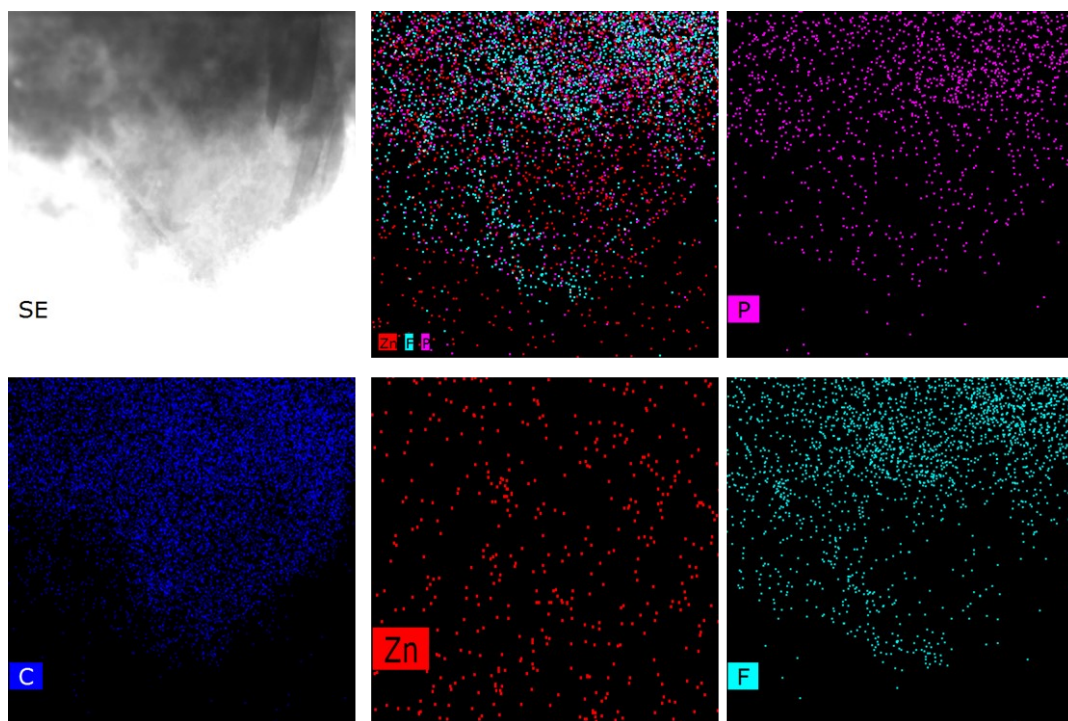

**Fig. S10.** TEM image and EDX mapping of 2Zn-graphite electrode after 500 cycles of charge/discharge.

**Table S1.** Comparative analysis of rate performance for 2Zn-graphite and related graphite-based anodes reported in recent studies.

| Cell system    | Anode structure                       | Rate Performance (mAh g <sup>-1</sup> ) | Electrochemical Stability Window (V) | Reference |
|----------------|---------------------------------------|-----------------------------------------|--------------------------------------|-----------|
| Graphite // Li | Uncoated graphite                     | 26@5C                                   | 0.01-1.5 V                           | This work |
|                | 2Zn-graphite                          | 109@5C                                  |                                      |           |
| Graphite // Li | Bare graphite                         | 25@4C<br>10 @6C                         | 0.01-1.5 V                           | 1         |
|                | Aligned graphene array +graphite      | 75 @4C<br>50@6C                         |                                      |           |
| Graphite // Li | Bare graphite                         | 50 @ 5C                                 | 0-1.5 V                              | 2         |
|                | Graphite coated with amorphous carbon | 100 @5C                                 |                                      |           |
| Graphite // Li | Pristine graphite                     | 90@4C<br>80@6C                          | 0-1.5 V                              | 3         |
|                | P-S-graphite                          | 100@4C<br>90@6C                         |                                      |           |
| Graphite // Li | Graphite bare                         | 117@2C                                  | 0.01-1.2 V                           | 4         |
|                | Graphite with heat treatment          | 145@2C                                  |                                      |           |

#### References:

1. Zhang C, Dong L, Zheng N, Zhu H, Wu C, Zhao F, et al. Aligned graphene array anodes with dendrite-free behavior for high-performance Li-ion batteries. *Energy Storage Materials*. 2021;37:296-305.
2. Ma Z, Zhuang Y, Deng Y, Song X, Zuo X, Xiao X, et al. From spent graphite to amorphous sp<sup>2</sup>+ sp<sup>3</sup> carbon-coated sp<sup>2</sup> graphite for high-performance lithium ion batteries. *Journal of Power Sources*. 2018;376:91-9.
3. Tu S, Zhang B, Zhang Y, Chen Z, Wang X, Zhan R, et al. Fast-charging capability of graphite-based lithium-ion batteries enabled by Li<sub>3</sub>P-based crystalline solid–electrolyte interphase. *Nature Energy*. 2023;8(12):1365-74.
4. Jin Y, Yu H, Liang X. Simple approach: Heat treatment to improve the electrochemical performance of commonly used anode electrodes for lithium-ion batteries. *ACS Applied Materials & Interfaces*. 2020;12(37):41368-80.
